# Supplementary material
Source: Springer Nature journal article supplement (https://www.springermedizin.de/resource/supplementary/12875_2013_928_MOESM3_ESM.pdf/9435420)
Supplement: MOESM3 [file 9435420]

## Quality appraisal of studies

| <b>Qualitative studies</b>                             | [61] | [60] | [72] | [73] | [70] | [57] | [17] | [79] | [69] | [63] | [64] | [65] | [67] | [66] |
|--------------------------------------------------------|------|------|------|------|------|------|------|------|------|------|------|------|------|------|
| Philosophy congruent with methodology                  | U    | U    | U    | U    | +    | U    | +    | U    | +    | U    | U    | -    | -    | U    |
| Methodology congruent with aim                         | +    | +    | +    | +    | +    | +    | +    | U    | +    | +    | +    | +    | +    | +    |
| Methodology congruent with data collection methods     | U    | +    | +    | +    | +    | +    | +    | +    | +    | +    | +    | +    | +    | +    |
| Methodology congruent with analysis                    | -    | +    | +    | U    | +    | +    | +    | U    | +    | +    | +    | +    | U    | +    |
| Methodology congruent with interpretation of results   | -    | +    | +    | +    | +    | +    | +    | U    | +    | +    | -    | +    | +    | +    |
| Researcher background stated                           | -    | -    | -    | -    | +    | -    | +    | +    | -    | -    | -    | -    | -    | -    |
| Influence of researcher stated                         | -    | -    | -    | -    | -    | -    | +    | +    | -    | U    | -    | -    | -    | -    |
| Participant voices adequately represented              | U    | +    | +    | +    | +    | U    | +    | U    | +    | +    | +    | +    | +    | +    |
| Ethical approval                                       | U    | +    | +    | +    | +    | +    | +    | U    | +    | +    | +    | -    | -    | U    |
| Conclusions derived from data                          | -    | +    | +    | +    | +    | +    | +    | +    | +    | +    | +    | +    | +    | +    |
| <b>Survey studies</b>                                  | [14] | [77] | *    | [76] | [13] | [68] | [75] | [71] | [74] | [62] | [81] | [80] | [78] |      |
| Clear aim addressed                                    | +    | +    | +    | +    | +    | +    | +    | +    | +    | +    | +    | +    | +    |      |
| Design appropriate for research question               | +    | +    | +    | +    | +    | +    | +    | +    | +    | +    | +    | +    | +    |      |
| Clear selection process                                | +    | +    | +    | +    | +    | -    | +    | +    | +    | +    | +    | +    | +    |      |
| Potential for selection bias                           | +    | -    | +    | +    | -    | U    | +    | -    | +    | -    | +    | -    | +    |      |
| Subjects are representative                            | -    | -    | -    | -    | +    | -    | -    | -    | -    | +    | -    | -    | -    |      |
| Power analysis included                                | -    | -    | NA   | -    | -    | NA   | -    | -    | -    | -    | NA   | -    | -    |      |
| Response rate in % (satisfactory if $\geq 60\%$ )**    | 68.8 | 42   | 46.2 | 33   | 96.5 | 61.4 | 61.4 | 17.3 | 65   | 81%  | 46.3 | 53   | 23.3 |      |
| Valid and reliable measurements                        | +    | +    | U    | U    | U    | U    | U    | U    | +    | +    | U    | +    | +    |      |
| Statistical significance assessed                      | +    | +    | NA   | +    | +    | NA   | +    | +    | +    | U    | NA   | +    | +    |      |
| Confidence intervals given                             | -    | -    | -    | -    | -    | NA   | -    | -    | -    | -    | NA   | -    | -    |      |
| Unaccounted confounding factors present                | +    | +    | U    | +    | +    | NA   | -    | +    | +    | +    | NA   | -    | -    |      |
| <b>Mixed-methods studies</b>                           | [58] | [19] |      |      |      |      |      |      |      |      |      |      |      |      |
| Qualitative objective present                          | +    | +    |      |      |      |      |      |      |      |      |      |      |      |      |
| Design/methods appropriate for research question       | +    | +    |      |      |      |      |      |      |      |      |      |      |      |      |
| Context described                                      | +    | +    |      |      |      |      |      |      |      |      |      |      |      |      |
| Participants described & sample justified              | -    | +    |      |      |      |      |      |      |      |      |      |      |      |      |
| Qual data collection & analysis described              | +    | +    |      |      |      |      |      |      |      |      |      |      |      |      |
| Researcher's reflexivity described                     | -    | -    |      |      |      |      |      |      |      |      |      |      |      |      |
| Quant sampling & sample appropriate                    | -    | -    |      |      |      |      |      |      |      |      |      |      |      |      |
| Justification of measurements (validity)               | +    | +    |      |      |      |      |      |      |      |      |      |      |      |      |
| Confounding variables controlled                       | -    | -    |      |      |      |      |      |      |      |      |      |      |      |      |
| Mixed-methods design justified by authors              | -    | 1    |      |      |      |      |      |      |      |      |      |      |      |      |
| Combination of qual & quant data collection & analysis | +    | +    |      |      |      |      |      |      |      |      |      |      |      |      |
| Integration qual & quant results                       | +    | -    |      |      |      |      |      |      |      |      |      |      |      |      |
| <b>Descriptive cross-sectional study</b>               | [59] |      |      |      |      |      |      |      |      |      |      |      |      |      |
| Clear aim addressed                                    | +    |      |      |      |      |      |      |      |      |      |      |      |      |      |
| Methods appropriate for research question              | +    |      |      |      |      |      |      |      |      |      |      |      |      |      |
| Sample representative                                  | -    |      |      |      |      |      |      |      |      |      |      |      |      |      |
| Measurements accurate and valid                        | U    |      |      |      |      |      |      |      |      |      |      |      |      |      |
| Data collection method appropriate                     | +    |      |      |      |      |      |      |      |      |      |      |      |      |      |
| Participant number large enough                        | U    |      |      |      |      |      |      |      |      |      |      |      |      |      |
| Results correct presented                              | +    |      |      |      |      |      |      |      |      |      |      |      |      |      |
| Analysis correct                                       | -    |      |      |      |      |      |      |      |      |      |      |      |      |      |
| Findings clearly stated                                | +    |      |      |      |      |      |      |      |      |      |      |      |      |      |

+ = yes; - = no; U = unclear; NA = Criterion not applicable because of descriptive design;

\* Bergeson J, Cash R, Boulger J, Bergeron D: The attitudes of rural Minnesota family physicians toward nurse practitioners and physician assistants. J Rural Health 1997, 13(3):196-205.

\*\* 60% was chosen based on recommendations in the literature
